# Supplementary material
Source: PubMed Central journal article supplement (PMC2893406)
Supplement: NIHMS200694-supplement-1_si_001.pdf [file NIHMS200694-supplement-1_si_001.pdf]

Supplemental Table 1. Irreversible rate constants ( $k_{\text{obs}}$ ) for formation of open complexes as a function of of  $[\text{RNAP}]_{\text{total}}$  and  $[\text{Na}^+]$  in  $\text{Cl}^-$  Buffer at 25 °C<sup>a</sup>

| $[\text{Na}^+]$<br>(M) | RNAP<br>(nM) | $k_{\text{obs}}$ ( $\text{s}^{-1}$ ) | $[\text{Na}^+]$<br>(M) | RNAP<br>(nM) | $k_{\text{obs}}$ ( $\text{s}^{-1}$ ) |
|------------------------|--------------|--------------------------------------|------------------------|--------------|--------------------------------------|
| 0.15                   | 1            | $(4.9 \pm 0.3) \times 10^{-2}$       | 0.25                   | 7            | $(7.7 \pm 0.7) \times 10^{-3}$       |
|                        | 5            | $(1.9 \pm 0.1) \times 10^{-1}$       |                        |              |                                      |
|                        | 15.6         | $(2.7 \pm 0.1) \times 10^{-1}$       |                        |              |                                      |
|                        | 56.7         | $(3.2 \pm 0.1) \times 10^{-1}$       |                        |              |                                      |
|                        | 100          | $(3.2 \pm 0.2) \times 10^{-1}$       |                        |              |                                      |
| 0.17                   | 5            | $(9.6 \pm 0.7) \times 10^{-2}$       | 0.27                   | 7            | $(4.2 \pm 0.2) \times 10^{-3}$       |
|                        | 12.9         | $(2.1 \pm 0.1) \times 10^{-1}$       |                        |              |                                      |
|                        | 30           | $(2.3 \pm 0.1) \times 10^{-1}$       |                        |              |                                      |
|                        | 100          | $(2.8 \pm 0.1) \times 10^{-1}$       |                        |              |                                      |
| 0.19                   | 7            | $(5.7 \pm 0.7) \times 10^{-2}$       |                        |              |                                      |
|                        | 25           | $(1.61 \pm 0.08) \times 10^{-1}$     |                        |              |                                      |
|                        | 50           | $(2.1 \pm 0.1) \times 10^{-1}$       |                        |              |                                      |
|                        | 80           | $(2.3 \pm 0.2) \times 10^{-1}$       |                        |              |                                      |
|                        | 120          | $(2.3 \pm 0.1) \times 10^{-1}$       |                        |              |                                      |
| 0.21                   | 7            | $(3.1 \pm 0.3) \times 10^{-2}$       |                        |              |                                      |
|                        | 25           | $(8.0 \pm 0.6) \times 10^{-2}$       |                        |              |                                      |
|                        | 50           | $(1.3 \pm 0.1) \times 10^{-1}$       |                        |              |                                      |
|                        | 80           | $(1.63 \pm 0.09) \times 10^{-1}$     |                        |              |                                      |
|                        | 129          | $(1.85 \pm 0.09) \times 10^{-1}$     |                        |              |                                      |
| 0.23                   | 1            | $(1.4 \pm 0.2) \times 10^{-3}$       |                        |              |                                      |
|                        | 2            | $(1.9 \pm 0.2) \times 10^{-3}$       |                        |              |                                      |
|                        | 3            | $(4.6 \pm 0.3) \times 10^{-3}$       |                        |              |                                      |
|                        | 5            | $(7.0 \pm 0.4) \times 10^{-3}$       |                        |              |                                      |
|                        | 10           | $(1.6 \pm 0.1) \times 10^{-2}$       |                        |              |                                      |
|                        | 20           | $(3.0 \pm 0.2) \times 10^{-2}$       |                        |              |                                      |
|                        | 31           | $(4.3 \pm 2.0) \times 10^{-2}$       |                        |              |                                      |
|                        | 31           | $(4.3 \pm 0.3) \times 10^{-2}$       |                        |              |                                      |
|                        | 43.7         | $(6.7 \pm 0.6) \times 10^{-2}$       |                        |              |                                      |
|                        | 48           | $(7.0 \pm 0.6) \times 10^{-2}$       |                        |              |                                      |
|                        | 59.8         | $(7.6 \pm 0.6) \times 10^{-2}$       |                        |              |                                      |
|                        | 67.4         | $(8.3 \pm 0.7) \times 10^{-2}$       |                        |              |                                      |
|                        | 90           | $(9.0 \pm 0.6) \times 10^{-2}$       |                        |              |                                      |
|                        | 133          | $(1.04 \pm 0.07) \times 10^{-1}$     |                        |              |                                      |

<sup>a</sup>Concentrations of RNAP are active. Values of  $k_{\text{obs}}$  determined by fitting the fraction of promoter DNA bound in open complexes as a function of time to eq 1. With the exception of 31 nM RNAP at 0.23 M  $\text{Na}^+$ ,  $k_{\text{obs}}$  was determined once for each  $[\text{RNAP}]$ ; associated error is from the fitting program. Otherwise, the reported error is calculated from the standard deviation ( $\delta(n-1)$ ) of multiple values of  $k_{\text{obs}}$ . At 0.23 M  $\text{Na}^+$ , the first seven entries for  $k_{\text{obs}}$  were determined using manual mixing, the remaining were determined using rapid quench mixing. At 0.25 and 0.27 M  $\text{Na}^+$   $k_{\text{obs}}$  was determined using manual mixing.
