# Supplementary material
Source: PubMed Central journal article supplement (PMC2893406)
Supplement: NIHMS200694-supplement-2_si_002.pdf [file NIHMS200694-supplement-2_si_002.pdf]

Supplemental Table 2. Irreversible rate constants ( $k_{\text{obs}}$ ) for formation of open complexes as a function of  $[\text{RNAP}]_{\text{total}}$  and  $[\text{Na}^+]$  in  $\text{Glu}^-$  and  $\text{F}^-$  Buffers at 25 °C<sup>a</sup>

| [Na <sup>+</sup> ] (M)   | RNAP (nM)                      | $k_{\text{obs}}$ (s <sup>-1</sup> ) | Number of determinations |
|--------------------------|--------------------------------|-------------------------------------|--------------------------|
| 0.23<br>Glu <sup>-</sup> | 1.25                           | $(7.3 \pm 0.4) \times 10^{-2}$      | 2                        |
|                          | 2.90                           | $(8.2 \pm 0.7) \times 10^{-2}$      |                          |
|                          | 3.16                           | $(1.0 \pm 0.1) \times 10^{-1}$      |                          |
|                          | 7.16                           | $(1.2 \pm 0.1) \times 10^{-1}$      |                          |
|                          | 8.87                           | $(1.60 \pm 0.09) \times 10^{-1}$    |                          |
|                          | 1.63                           | $(2.0 \pm 0.2) \times 10^{-1}$      |                          |
|                          | 2.14                           | $(2.1 \pm 0.1) \times 10^{-1}$      |                          |
|                          | 4.00                           | $(1.8 \pm 0.1) \times 10^{-1}$      |                          |
|                          | 4.29                           | $(2.1 \pm 0.2) \times 10^{-1}$      |                          |
|                          | 7.98                           | $(1.9 \pm 0.1) \times 10^{-1}$      |                          |
| 0.25                     | 1.25                           | $(5.5 \pm 0.5) \times 10^{-2}$      | 2                        |
|                          | 2.32                           | $(5.4 \pm 1.0) \times 10^{-2}$      |                          |
|                          | 3.69                           | $(1.1 \pm 0.1) \times 10^{-1}$      |                          |
|                          | 9.48                           | $(1.4 \pm 0.2) \times 10^{-1}$      |                          |
|                          | 13.3                           | $(1.6 \pm 0.1) \times 10^{-1}$      |                          |
|                          | 14.4                           | $(1.7 \pm 0.2) \times 10^{-1}$      |                          |
|                          | 26.6                           | $(1.8 \pm 0.1) \times 10^{-1}$      |                          |
|                          | 51.9                           | $(1.9 \pm 0.1) \times 10^{-1}$      |                          |
| 0.27                     | 3.14                           | $(4.6 \pm 0.3) \times 10^{-2}$      | 2                        |
|                          | 5.79                           | $(5.1 \pm 0.6) \times 10^{-2}$      |                          |
|                          | 7.39                           | $(8.5 \pm 1.0) \times 10^{-2}$      |                          |
|                          | 13.7                           | $(9.6 \pm 0.7) \times 10^{-2}$      |                          |
|                          | 18.9                           | $(1.3 \pm 0.1) \times 10^{-1}$      |                          |
|                          | 20.5                           | $(1.4 \pm 0.2) \times 10^{-1}$      |                          |
|                          | 37.8                           | $(1.4 \pm 0.1) \times 10^{-1}$      |                          |
|                          | 39.2                           | $(1.5 \pm 0.1) \times 10^{-1}$      |                          |
|                          | 62.8                           | $(1.8 \pm 0.1) \times 10^{-1}$      |                          |
|                          | 65.0                           | $(1.8 \pm 0.1) \times 10^{-1}$      |                          |
| 0.29                     | 2.95                           | $(3.3 \pm 0.3) \times 10^{-2}$      | 2                        |
|                          | 7.85                           | $(7.0 \pm 0.6) \times 10^{-2}$      |                          |
|                          | 8.01                           | $(6.8 \pm 0.4) \times 10^{-2}$      |                          |
|                          | 14.7                           | $(1.1 \pm 0.1) \times 10^{-1}$      |                          |
|                          | 16.5                           | $(9.9 \pm 1.1) \times 10^{-2}$      |                          |
|                          | 30.8                           | $(1.4 \pm 0.1) \times 10^{-1}$      |                          |
|                          | 32.9                           | $(1.3 \pm 0.1) \times 10^{-1}$      |                          |
| 58.7                     | $(1.6 \pm 0.1) \times 10^{-1}$ |                                     |                          |

|      |      |                                |   |
|------|------|--------------------------------|---|
|      | 62.8 | $(1.3 \pm 0.1) \times 10^{-1}$ |   |
| 0.34 | 7    | $(2.0 \pm 0.7) \times 10^{-2}$ | 2 |
| 0.38 | 7    | $(1.4 \pm 0.4) \times 10^{-2}$ |   |
| 0.42 | 7    | $(2.1 \pm 0.3) \times 10^{-3}$ |   |
| 0.46 | 7    | $(2.5 \pm 1.3) \times 10^{-3}$ | 3 |
| 0.55 | 7    | $(7.3 \pm 3.4) \times 10^{-4}$ | 2 |
| 0.64 | 7    | $(1.9 \pm 1.1) \times 10^{-4}$ | 2 |
| F    |      |                                |   |
| 0.37 | 7    | $(9.5 \pm 0.x) \times 10^{-3}$ |   |
| 0.45 | 7    | $(1.6 \pm 0.x) \times 10^{-3}$ |   |
| 0.50 | 7    | $(9.9 \pm 0.x) \times 10^{-4}$ |   |
| 0.63 | 7    | $(4.1 \pm 0.x) \times 10^{-3}$ |   |

<sup>a</sup>Concentrations of RNAP are active. Values of  $k_{\text{obs}}$  determined by fitting the fraction of promoter DNA bound in open complexes as a function of time to eq 1. Unless noted otherwise,  $k_{\text{obs}}$  was determined once for each [RNAP]; associated error is from the fitting program. Otherwise, the reported error is calculated from the standard deviation ( $\delta(n-1)$ ) of multiple values of  $k_{\text{obs}}$ . Values of  $k_{\text{obs}}$  for  $[\text{Na}^+] \leq 0.29 \text{ M}$  were determined using rapid quench mixing; manual mixing was used to determine  $k_{\text{obs}}$  for  $[\text{Na}^+] > 0.29 \text{ M}$ .
