# Supplementary material
Source: PubMed Central journal article supplement (PMC2893406)
Supplement: NIHMS200694-supplement-3_si_003.pdf [file NIHMS200694-supplement-3_si_003.pdf]

Supplemental Table 3. Analysis of Relaxation to Equilibrium Data at 25 °C (see Methods, Fig 6 in Text)

| [Na <sup>+</sup> ]<br>M | [Hep]<br>(μg/m<br>L) | ~[Hep]<br>(M) | k <sub>r</sub><br>(s <sup>-1</sup> ) | error in k <sub>r</sub><br>(s <sup>-1</sup> ) | Fit [R] <sub>free</sub><br>(M) | error in<br>[R] <sub>free</sub><br>(M) | K <sub>heparin</sub> <sup>1</sup><br>(M <sup>-1</sup> ) | error in<br>K <sub>heparin</sub><br>(M <sup>-1</sup> ) | Fit k <sub>d</sub> <sup>1</sup><br>(s <sup>-1</sup> ) | error in k <sub>d</sub><br>(s <sup>-1</sup> ) |
|-------------------------|----------------------|---------------|--------------------------------------|-----------------------------------------------|--------------------------------|----------------------------------------|---------------------------------------------------------|--------------------------------------------------------|-------------------------------------------------------|-----------------------------------------------|
| Glu <sup>-</sup>        |                      |               |                                      |                                               |                                |                                        |                                                         |                                                        |                                                       |                                               |
| 0.34                    | 100                  | 6.70E-06      | 1.66E-05                             | 2.51E-06                                      | 3.75E-12                       | 1.83E-13                               | 2.80E+08                                                | 1.30E+07                                               | 3.75E-06                                              | 7.29E-07                                      |
|                         | 150                  | 1.00E-05      | 1.75E-05                             | 2.70E-06                                      | 2.56E-12                       | 1.93E-13                               | 2.73E+08                                                | 1.92E+07                                               | 8.92E-06                                              | 1.48E-06                                      |
|                         | 300                  | 2.00E-05      | 1.58E-05                             | 2.76E-06                                      | 1.20E-12                       | 1.84E-13                               | 2.92E+08                                                | 3.90E+07                                               | 1.23E-05                                              | 3.56E-06                                      |
|                         |                      |               |                                      |                                               |                                |                                        | 2.82E+08                                                | 9.61E+06                                               | 8.31E-06                                              | 4.29E-06                                      |
| 0.43                    | 100                  | 6.70E-06      | 0.000135                             | 8.75E-06                                      | 2.49E-10                       | 1.77E-11                               | 4.07E+06                                                | 2.79E+05                                               | 8.80E-06                                              | 3.19E-06                                      |
|                         | 200                  | 1.30E-05      | 7.67E-05                             | 8.90E-06                                      | 1.22E-10                       | 1.06E-11                               | 4.24E+06                                                | 3.45E+05                                               | 1.65E-05                                              | 3.16E-06                                      |
|                         | 300                  | 2.00E-05      | 6.80E-05                             | 1.33E-05                                      | 1.08E-10                       | 9.68E-12                               | 3.18E+06                                                | 2.65E+05                                               | 1.64E-05                                              | 3.11E-06                                      |
|                         | 600                  | 4.00E-05      | 5.00E-05                             | 6.70E-06                                      | 6.44E-11                       | 6.63E-12                               | 2.69E+06                                                | 2.53E+05                                               | 1.41E-05                                              | 2.90E-06                                      |
|                         | 1000                 | 6.70E-05      | 4.66E-05                             | 5.60E-06                                      | 2.64E-11                       | 6.15E-12                               | 3.97E+06                                                | 7.54E+05                                               | 2.88E-05                                              | 9.50E-06                                      |
|                         |                      |               |                                      |                                               |                                |                                        | 3.63E+06                                                | 6.64E+05                                               | 1.69E-05                                              | 7.33E-06                                      |
| 0.46                    | 100                  | 6.70E-06      | 0.000108                             | 6.30E-06                                      | 3.26E-10                       | 1.77E-11                               | 3.07E+06                                                | 1.66E+05                                               | 7.47E-06                                              | 2.41E-06                                      |
|                         | 200                  | 1.30E-05      | 5.93E-05                             | 4.56E-06                                      | 1.85E-10                       | 1.09E-11                               | 2.76E+06                                                | 1.58E+05                                               | 3.73E-06                                              | 1.58E-06                                      |
|                         | 300                  | 2.00E-05      | 5.48E-05                             | 5.47E-06                                      | 1.36E-10                       | 1.02E-11                               | 2.52E+06                                                | 1.79E+05                                               | 1.35E-05                                              | 2.37E-06                                      |
|                         | 600                  | 4.00E-05      | 4.16E-05                             | 3.50E-06                                      | 6.53E-11                       | 8.10E-12                               | 2.66E+06                                                | 2.96E+05                                               | 1.94E-05                                              | 4.18E-06                                      |
|                         | 1000                 | 6.70E-05      | 2.87E-05                             | 3.43E-06                                      | 2.96E-11                       | 6.42E-12                               | 3.53E+06                                                | 6.32E+05                                               | 1.72E-05                                              | 6.84E-06                                      |
|                         | 100                  | 6.70E-06      | 0.000127                             | 2.37E-05                                      | 4.73E-10                       | 2.85E-11                               | 2.07E+06                                                | 1.26E+05                                               | 1.05E-05                                              | 3.32E-06                                      |
|                         | 300                  | 2.00E-05      | 5.47E-05                             | 4.64E-06                                      | 1.50E-10                       | 1.04E-11                               | 2.28E+06                                                | 1.50E+05                                               | 9.93E-06                                              | 1.87E-06                                      |
|                         | 600                  | 4.00E-05      | 3.03E-05                             | 2.28E-06                                      | 6.38E-11                       | 6.68E-12                               | 2.72E+06                                                | 2.60E+05                                               | 1.14E-05                                              | 2.17E-06                                      |
|                         | 1000                 | 6.70E-05      | 2.45E-05                             | 2.88E-06                                      | 3.03E-11                       | 5.56E-12                               | 3.45E+06                                                | 5.38E+05                                               | 1.40E-05                                              | 4.06E-06                                      |
|                         |                      |               |                                      |                                               |                                |                                        |                                                         | 2.79E+06                                               | 4.93E+05                                              | 1.19E-05                                      |

0.55

|      |          |          |          |          |          |          |          |          |          |
|------|----------|----------|----------|----------|----------|----------|----------|----------|----------|
| 100  | 6.70E-06 | 0.000121 | 2.03E-05 | 9.58E-10 | 9.27E-11 | 9.47E+05 | 9.68E+04 | 1.30E-05 | 4.54E-06 |
| 200  | 1.30E-05 | 7.84E-05 | 1.48E-05 | 5.56E-10 | 6.33E-11 | 8.69E+05 | 9.65E+04 | 1.53E-05 | 4.12E-06 |
| 300  | 2.00E-05 | 6.73E-05 | 1.37E-05 | 4.05E-10 | 5.47E-11 | 8.14E+05 | 1.03E+05 | 2.01E-05 | 4.97E-06 |
| 600  | 4.00E-05 | 4.68E-05 | 7.44E-06 | 2.78E-10 | 4.08E-11 | 6.04E+05 | 8.03E+04 | 1.52E-05 | 4.18E-06 |
| 1000 | 6.70E-05 | 4.12E-05 | 1.20E-05 | 1.33E-10 | 3.69E-11 | 7.77E+05 | 1.73E+05 | 2.64E-05 | 1.05E-05 |
|      |          |          |          |          |          | 8.02E+05 | 1.28E+05 | 1.80E-05 | 5.38E-06 |

0.57

|      |          |          |          |          |          |          |          |          |          |
|------|----------|----------|----------|----------|----------|----------|----------|----------|----------|
| 200  | 1.30E-05 | 5.03E-05 | 4.17E-06 | 6.80E-10 | 3.64E-11 | 6.97E+05 | 3.92E+04 | 1.18E-05 | 1.59E-06 |
| 300  | 2.00E-05 | 4.67E-05 | 6.10E-06 | 5.54E-10 | 3.57E-11 | 5.82E+05 | 3.83E+04 | 1.72E-05 | 2.18E-06 |
| 600  | 4.00E-05 | 3.80E-05 | 4.71E-06 | 3.22E-10 | 3.17E-11 | 5.18E+05 | 4.87E+04 | 2.08E-05 | 3.57E-06 |
| 1000 | 6.70E-05 | 3.24E-05 | 4.02E-06 | 1.88E-10 | 2.77E-11 | 5.44E+05 | 7.18E+04 | 2.04E-05 | 5.34E-06 |
|      |          |          |          |          |          | 5.85E+05 | 7.88E+04 | 1.75E-05 | 4.17E-06 |

F

0.37

---

|     |          |          |          |          |          |          |          |          |          |
|-----|----------|----------|----------|----------|----------|----------|----------|----------|----------|
| 100 | 6.70E-06 | 5.98E-05 | 6.15E-06 | 2.56E-11 | 1.68E-12 | 4.09E+07 | 2.53E+06 | 1.54E-05 | 1.91E-06 |
| 150 | 1.00E-05 | 2.21E-05 | 5.27E-06 | 9.56E-12 | 8.81E-13 | 7.31E+07 | 6.18E+06 | 1.03E-05 | 1.87E-06 |
| 300 | 2.00E-05 | 1.43E-05 | 4.10E-06 | 3.79E-12 | 6.63E-13 | 9.22E+07 | 1.37E+07 | 1.06E-05 | 3.67E-06 |
|     |          |          |          |          |          | 6.87E+07 | 2.60E+07 | 1.21E-05 | 2.87E-06 |

0.45

|      |          |          |          |          |          |          |          |          |          |
|------|----------|----------|----------|----------|----------|----------|----------|----------|----------|
| 100  | 6.70E-06 | 9.45E-05 | 1.36E-05 | 2.74E-10 | 2.63E-11 | 3.68E+06 | 3.35E+05 | 8.73E-06 | 3.48E-06 |
| 200  | 1.30E-05 | 5.20E-05 | 6.99E-06 | 1.26E-10 | 1.40E-11 | 4.08E+06 | 4.14E+05 | 8.71E-06 | 2.54E-06 |
| 300  | 2.00E-05 | 5.26E-05 | 8.70E-06 | 9.81E-11 | 1.34E-11 | 3.52E+06 | 4.28E+05 | 1.54E-05 | 3.73E-06 |
| 600  | 4.00E-05 | 4.23E-05 | 8.00E-06 | 4.31E-11 | 1.07E-11 | 4.03E+06 | 8.04E+05 | 2.16E-05 | 7.60E-06 |
| 1000 | 6.70E-05 | 3.27E-05 | 9.68E-06 | 3.05E-11 | 8.25E-12 | 3.43E+06 | 7.32E+05 | 1.53E-05 | 6.54E-06 |
|      |          |          |          |          |          | 3.75E+06 | 2.98E+05 | 1.40E-05 | 5.42E-06 |

0.50

|     |          |          |          |          |          |          |          |          |          |
|-----|----------|----------|----------|----------|----------|----------|----------|----------|----------|
| 100 | 6.70E-06 | 9.07E-05 | 5.10E-06 | 6.31E-10 | 3.01E-11 | 1.51E+06 | 7.56E+04 | 2.57E-06 | 1.33E-06 |
| 300 | 2.00E-05 | 5.80E-05 | 2.86E-06 | 4.72E-10 | 3.26E-11 | 6.92E+05 | 4.80E+04 | 3.30E-05 | 3.46E-06 |
| 600 | 4.00E-05 | 4.91E-05 | 2.90E-06 | 1.15E-10 | 1.55E-11 | 1.49E+06 | 1.80E+05 | 2.73E-05 | 4.85E-06 |
|     |          |          |          |          |          | 1.23E+06 | 4.68E+05 | 2.10E-05 | 1.62E-05 |

0.61

|      |          |          |          |          |          |          |          |          |          |          |
|------|----------|----------|----------|----------|----------|----------|----------|----------|----------|----------|
|      |          |          |          |          |          |          |          | 6.38E-   |          |          |
| 100  | 6.70E-06 | 7.56E-05 | 1.14E-05 | 7.66E-10 | 8.65E-11 | 1.22E+06 | 1.39E+05 | 5.05E-05 | 6.38E-05 | 9.31E-06 |
| 200  | 1.30E-05 | 7.61E-05 | 6.61E-06 | 7.43E-10 | 8.92E-11 | 6.31E+05 | 7.57E+04 | 6.70E-05 | 1.03E-05 |          |
| 300  | 2.00E-05 | 8.85E-05 | 1.45E-05 | 6.83E-10 | 9.55E-11 | 4.63E+05 | 6.29E+04 | 7.47E-05 | 1.31E-05 |          |
| 600  | 4.00E-05 | 7.34E-05 | 7.80E-06 | 4.41E-10 | 8.12E-11 | 3.72E+05 | 6.17E+04 | 6.86E-05 | 1.59E-05 |          |
| 1000 | 6.70E-05 | 5.95E-05 | 1.11E-05 | 2.33E-10 | 5.88E-11 | 4.37E+05 | 9.11E+04 | 5.29E-05 | 1.72E-05 |          |
|      |          |          |          |          |          | 6.25E+05 | 3.47E+05 | 6.54E-05 | 8.01E-06 |          |

<sup>1</sup>The last entries in a column of fit  $K_{\text{heparin}}$  or  $k_d$  values at a given  $[\text{Na}^+]$  are the average; standard deviation of the average is given in the same row, in the appropriate error column.
